# Supplementary material for: The aridity index governs the variation of vegetation characteristics in alpine grassland, Northern Tibet Plateau
Source: PeerJ. 2019 Jul 15;7:e7272. doi: 10.7717/peerj.7272 (PMC6638191; doi:10.7717/peerj.7272)
Supplement: Supplemental Information 1 — the MAT, MAP, AI, SOC, C: N, STN, SR, BIO and COV represent mean annual temperature, mean annual precipitation, aridity index, soil organic carbon, the soil ratio of carbon to nitrogen, soil total nitrogen, species richness, aboveground biomass and coverage, respectively. [file peerj-07-7272-s001.xlsx]

## Sheet: Sheet1
Sample	Longitude	Latitude	Altitude	Vegetation type	MAT	MAP	AI	STN	SOC	C:N	BIO	COV	SR
P1	80.3815	32.3757	4522	Alpine meadow	1.45211	79.9147	6.97817	0.0400446	1.24069	41.5795	3.199	4.2	2.4
P2	80.9458	32.4648	4505	Alpine steppe	2.65264	100.957	7.97914	0.094518	2.62384	27.8886	1.137	1.9	2
P4	81.4806	32.2078	4814	Alpine meadow	3.44444	128.594	9.56487	0.0351677	0.264632	9.78411	10.408	21.4	2.6
P5	81.825	32.0759	4609	Alpine steppe	3.49942	150.568	11.1537	0.0714246	2.43652	35.3886	8.028	18.2	2.6
P6	82.212	32.2444	4420	Alpine steppe	3.56071	160.587	11.8421	0.0503157	2.04981	43.4548	15.841	18.8	3.4
P7	82.5626	32.5126	4406	Alpine steppe	3.50832	165.633	12.2616	0.08827	3.0356	45.4495	4.641	7.8	2.8
P8	82.9093	32.382	4470	Alpine meadow	2.75737	178.756	14.012	0.0761095	4.89324	71.3136	3.177	7.6	1.8
P9	83.2158	32.4328	4456	Alpine meadow	2.17706	181.054	14.8685	0.0886687	7.72047	101.262	14.173	13	4.8
P10	83.6198	32.3291	4427	Alpine steppe	1.23327	175.855	15.6549	0.101612	4.68739	54.3143	4.029	3.9	3
P11	83.8158	32.2754	4374	Alpine meadow	0.714756	171.961	16.049	0.142776	5.19962	38.0111	53.328	60	5
P12	84.0529	32.26	4475	Alpine meadow	0.435046	166.652	15.9704	0.0682657	1.75348	34.937	5.579	6	3.4
P13	84.2568	32.2621	4524	Alpine steppe	0.347316	164.948	15.9412	0.0900227	1.80958	20.76	11.885	25.4	3.2
P15	84.7931	32.1001	4435	Alpine steppe	0.877811	181.486	16.6841	0.0761123	1.86818	26.1128	7.601	11	3
P16	85.0792	31.9756	4590	Alpine steppe	1.35636	209.467	18.4449	0.0813526	2.1844	28.1402	9.047	17	7.2
P17	85.4957	32.023	4877	Alpine steppe	1.86226	252.734	21.3057	0.0919562	2.11344	23.3851	19.843	31	6
P18	85.8401	31.9248	4953	Alpine steppe	2.25348	293.465	23.9495	0.0974369	3.16181	34.3871	6.214	17.6	4
P19	86.2332	31.907	4755	Alpine steppe	2.53776	327.348	26.109	0.0908914	1.88784	21.2825	10.772	21.2	2.4
P20	86.5232	31.9337	4678	Alpine steppe	2.60457	337.623	26.7858	0.0695498	2.11741	34.3705	12.932	17.4	4.4
P24	87.0898	31.7921	4636	Alpine steppe	2.74383	348.087	27.3142	0.0930524	2.97723	42.1137	16.876	18	5.2
P25	86.8147	32.1008	4814	Alpine steppe	2.68079	342.669	27.0227	0.12996	2.83949	25.0603	42.036	21.6	6
P26	86.8005	32.1772	4660	Alpine steppe	2.66356	341.907	26.9993	0.079969	2.10373	26.8502	20.548	33.2	6.4
P27	87.4185	31.7842	4579	Alpine steppe	2.72738	345.167	27.1201	0.1078	2.63433	38.5636	33.672	27.8	5.6
P28	87.6792	31.8355	4546	Alpine steppe	2.58353	346.807	27.5604	0.0689459	2.88477	45.5271	34.7	29.4	10.4
P29	87.9025	31.8731	4533	Alpine steppe	2.40892	344.076	27.7281	0.0781516	1.72051	22.3391	24.104	26	8.2
P30	88.1833	31.868	4666	Alpine meadow	2.44032	353.214	28.3926	0.241287	3.60415	14.9764	35.668	32	6
P31	88.5213	31.7702	4572	Alpine steppe	2.25703	359.455	29.3264	0.111645	2.21096	20.4814	48.904	29.4	7.2
P32	88.4416	31.7982	4571	Alpine steppe	2.28585	358.475	29.1779	0.0643922	2.86677	52.8953	11.372	17.4	5.8
P34	88.876	31.5824	4596	Alpine steppe	2.03947	359.225	29.8373	0.0916856	2.17832	37.0449	24	31	8.8
P35	89.1461	31.5097	4608	Alpine meadow	1.77114	361.049	30.6724	0.427798	2.47331	26.1013	23.112	21.6	9.2
P36	90.0539	31.4968	4617	Alpine meadow	0.0996995	343.773	34.038	0.0977947	2.68878	47.3602	59.944	47.6	8.4
P37	90.0788	31.5955	4803	Alpine steppe	0.30435	354.244	34.3781	0.0707025	1.55799	30.3697	64.152	54.6	9.6
P38	90.0148	31.5901	4793	Alpine steppe	0.304023	351.767	34.1388	0.117096	2.0111	22.4154	70.304	39.2	8
P39	89.2797	31.9453	4647	Alpine steppe	1.4809	373.324	32.517	0.130388	2.52069	20.8443	56.26	38.4	10.2
P40	89.3547	31.8587	4570	Alpine meadow	1.39953	370.947	32.5406	0.469619	1.98562	99.5282	21.152	9.6	5.8
P41	89.3798	31.761	4574	Alpine steppe	1.3746	368.04	32.3563	0.0695177	1.4491	21.6177	44.168	29	8.6
P42	90.2441	31.3913	4650	Alpine steppe	0.140189	347.878	34.3068	0.127276	1.51023	14.055	101.648	36.6	8.2
P43	90.3448	31.3926	4632	Alpine steppe	0.412349	360.927	34.6633	0.097549	1.07589	12.8007	50.328	29.2	11.4
P44	90.1268	31.388	4788	Alpine steppe	-0.0749764	336.819	33.9363	0.149532	1.5382	10.3135	65.472	42.8	8.6
P45	90.4518	31.3649	4605	Alpine steppe	0.653632	375.007	35.1999	0.10464	1.22051	12.5466	72.052	46.4	8.8
P47	90.9474	31.3906	4548	Alpine steppe	0.791018	436.502	40.4505	0.114777	1.7266	17.4412	80.284	57.4	11.6
P48	91.3295	31.5011	4654	Alpine meadow	0.34816	453.125	43.7879	0.403882	1.65177	6.91328	56.904	57.4	8.2
P3	81.2124	32.3205	4544	Alpine meadow	3.12658	115.265	8.78106	0.0440987	0.500114	11.6292	13.736	2.44	2.2
P21	87.051	31.8917	4494	Alpine meadow	2.72602	347.419	27.2999	0.0577531	2.17971	45.3065	25.476	18	6
P49	91.48	31.5972	4568	Alpine meadow	-0.0366783	456.209	45.7889	0.187741	2.22747	12.6585	95.12	53.8	8.2
P50	91.6142	31.5725	4622	Alpine meadow	0.157653	461.794	45.4626	0.125916	1.33743	11.1157	52.928	47.6	7.8
P51	91.7245	31.62	4566	Alpine meadow	-0.0813139	461.939	46.5726	0.174357	1.79179	10.196	103.74	75.4	8.8
P52	91.7209	31.9391	4631	Alpine meadow	-0.324625	461.921	47.7419	0.109826	1.09152	9.58654	79.448	71	10.2
P53	91.7348	31.8342	4788	Alpine meadow	-0.148561	464.749	47.1758	0.315857	3.13237	28.0164	114.308	71.8	10
P54	91.8305	31.7153	4661	Alpine meadow	-0.0903072	465.272	46.9512	0.204018	2.22477	11.4355	149.3	69.4	11.6
P55	91.7838	31.2189	4586	Alpine meadow	-0.203582	458.519	46.8048	0.158574	1.63338	10.9707	67.084	59.6	7.4
P56	91.9014	31.3312	4537	Alpine meadow	-0.644072	452.454	48.3601	0.0961722	1.00742	10.2913	75.484	49	9.4
P57	91.9685	31.3809	4577	Alpine meadow	-0.697255	451.423	48.5258	0.182806	2.17285	11.6669	101.904	75.2	10
P58	92.0113	31.6398	4596	Alpine meadow	-0.163912	464.586	47.2328	0.223699	2.61229	11.226	125.088	82.4	7.4
P59	92.0144	31.6316	4591	Alpine meadow	-0.276021	464.223	47.74	0.211167	2.41019	11.826	93.592	66	6.8
P60	92.0009	31.5803	4602	Alpine meadow	-0.392828	460.918	47.9765	0.291939	1.49281	7.72638	102.192	70.6	8.8
